# Supplementary material for: Molecular Consequences of Pathogenic SDHA Variants: From Defective Flavinylation and Assembly to Lipid Remodeling
Source: Research Square preprint supplement (doi:10.21203/rs.3.rs-8568560/v1), 2026-01-21
Supplement: Supplementary file 1 [file 0c7340254900d90b72265b9b.docx]

**Supplementary figures**

**Molecular Consequences of Pathogenic SDHA Variants: From Defective Flavinylation and Assembly to Lipid Remodeling**

**María José Saucedo-Rodríguez1,2, Petr Pecina1, Kateřina Tauchamnnová1, Kristýna Čunátová1, Marek Vrbacký1, Tomáš Čajka3,Josef Houštěk1, Tomáš Mráček1 and Alena Pecinová1**

1 *Laboratory of Bioenergetics, Institute of Physiology, Czech Academy of Sciences, Prague, Czech Republic*

2 *Faculty of Science, Charles University, Prague, Czech Republic.*

3 *Laboratory of Translational Metabolism, Institute of Physiology, Czech Academy of Sciences, Prague, Czech Republic*

**
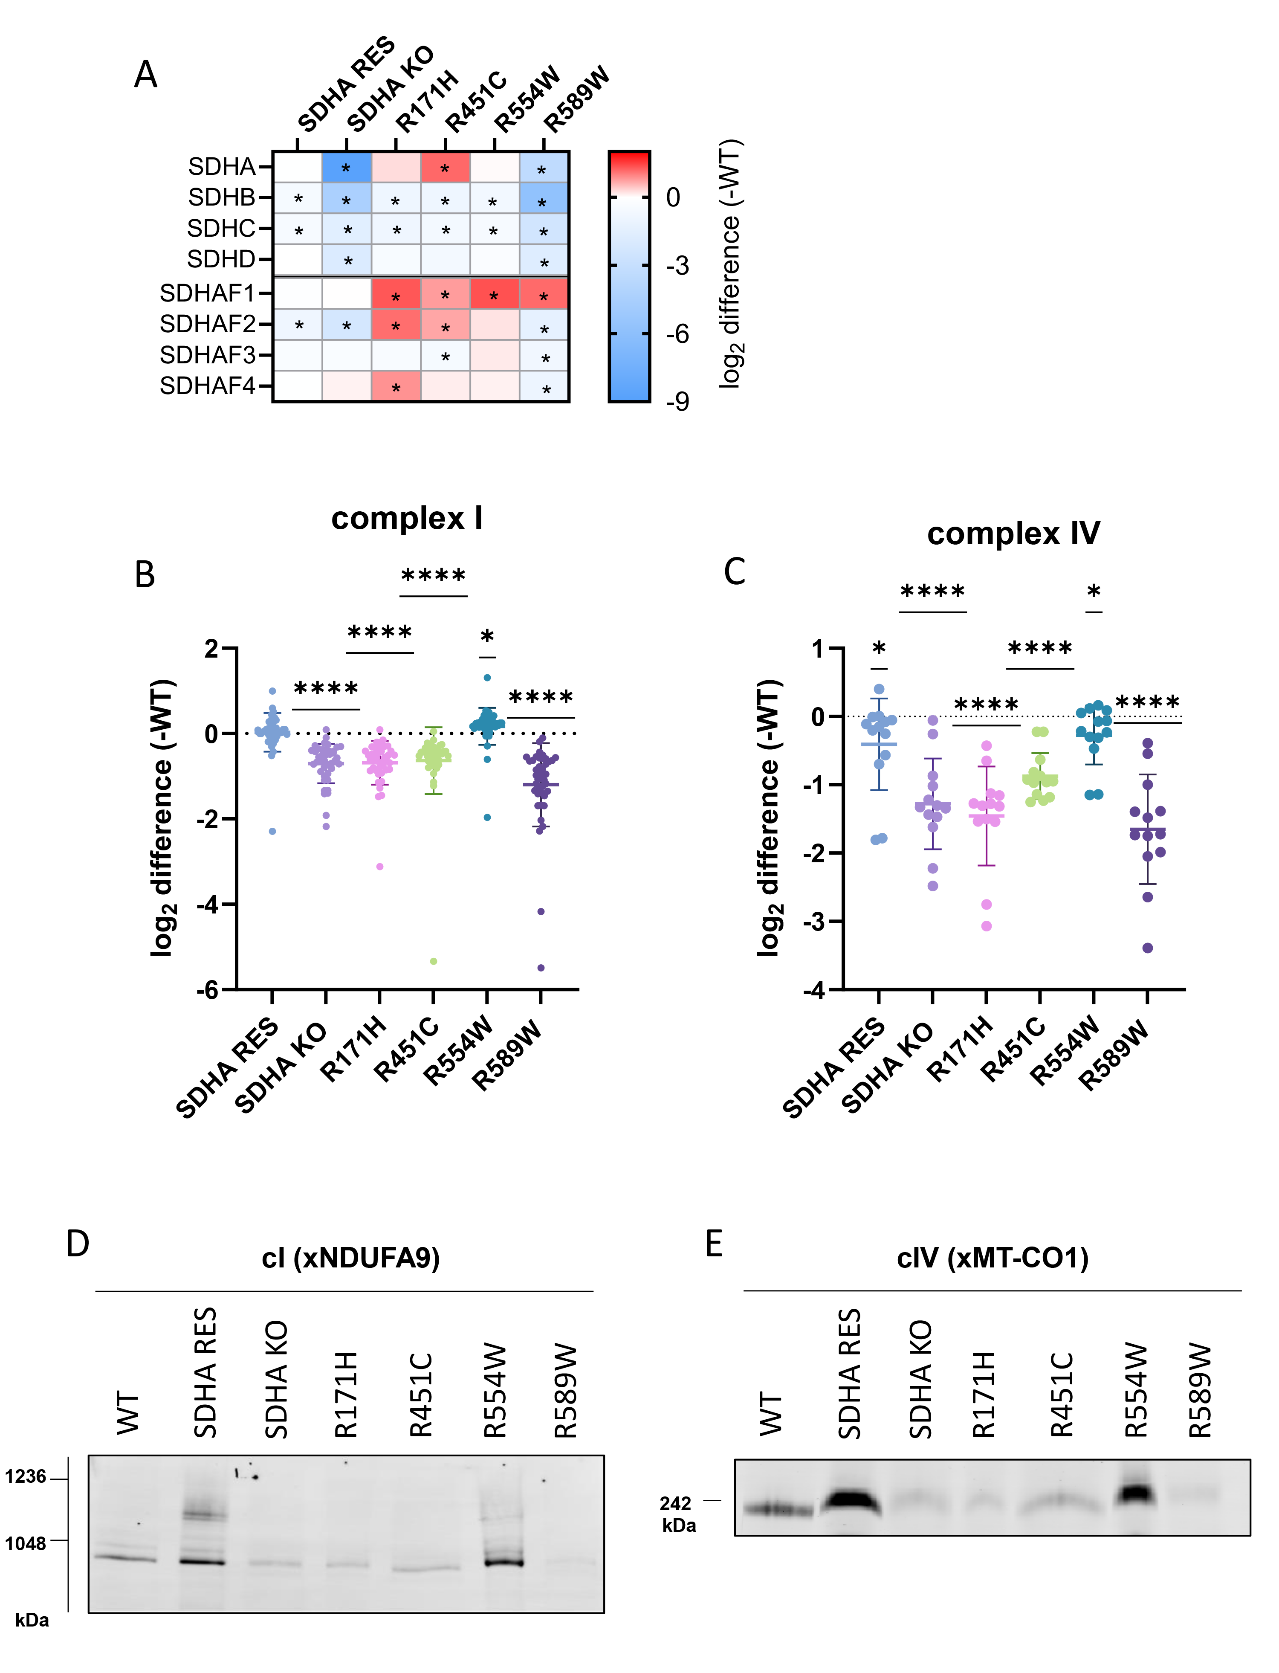
**

**Figure S1**. **Altered abundance and assembly of SDH complex components and secondary effects on respiratory chain subunits**

**(A)** Heatmap showing log₂ differences relative to WT for SDH subunits (SDHA-SDHD) and SDH assembly factors (SDHAF1-SDHAF4) based on label-free quantitative mass spectrometry (LFQ MS). Asterisks indicate significantly altered proteins (p-value < 0.05). The heatmap provides an expanded view of SDH-related changes shown in Figure 2A.

**(B)** Quantification of complex I subunits shown as log₂ differences relative to WT. Each point corresponds to an individual complex I subunit.

**(C)** Quantification of complex IV subunits displayed as log₂ differences relative to WT, plotted as in panel B.

One-sample t-test was performed (*p*-value: * <0.05; ** <0.0.1; *** <0.001; **** <0.0001; n = 3).

**(D)** Representative native PAGE immunoblot showing complex I assembly detected with an antibody against complex I subunit NDUFA9.

**(E)** Representative native PAGE immunoblot of complex IV monomer detected with an antibody against complex IV subunit MT-CO1.


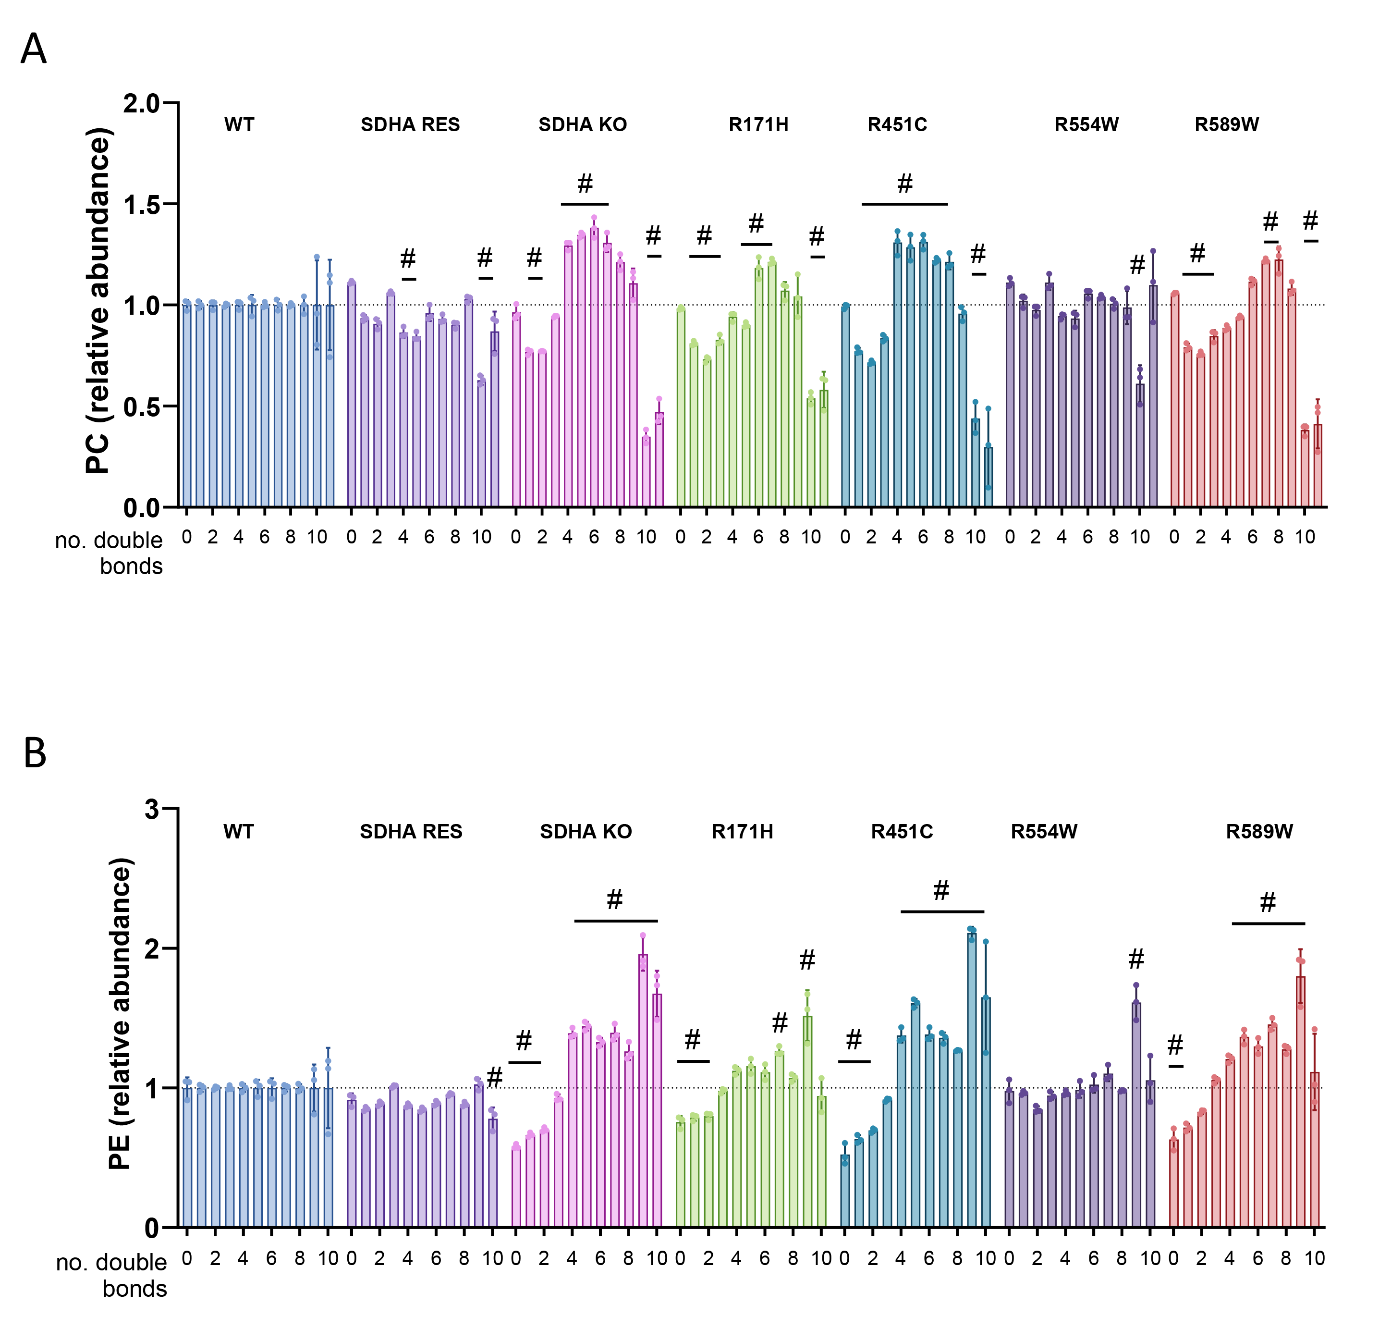


**Figure S2. Metabolomic analysis of membrane phospholipids.**

Relative abundance of phosphatidylcholines (PC) **(A)** and phosphatidylethanolamines (PE) **(B).** Each bar represents the mean ± SD (n = 3).
